# Supplementary material
Source: PubMed Central journal article supplement (PMC7725977)
Supplement: NIHMS1603016-supplement-1.pdf [file NIHMS1603016-supplement-1.pdf]

## Posttraumatic Stress Disorder and the Developing Adolescent Brain

### *Supplement*

#### **Prominent constructs for PTSD and evidence in adolescents**

##### *Threat and extinction learning*

Threat and extinction learning are dominant constructs in adult PTSD neurocircuitry models and provide intuitive, though overly simplistic (1–3), laboratory models for the development and retention of threat reactions to trauma cues in individuals who develop PTSD as well as for exposure-based treatments of PTSD (4,5). While healthy adolescents are capable of threat acquisition and extinction learning (6–9), they exhibit potentially important differences from adults that may factor into PTSD risk and treatment effectiveness. Notably, adolescents show attenuated contextual extinction learning which has been attributed to reduced prefrontal plasticity (8,10). Consistent with this notion, adolescents have been shown to have greater amygdala and hippocampal recruitment, but less discriminative prefrontal responses to threat learning compared to adults (11–13). Prior work implicates threat extinction deficits in adolescent anxiety disorders (14) but with potentially differential prefrontal recruitment during threat discrimination compared to anxious adults including increased, rather than decreased, amygdala-ventromedial prefrontal cortex (vmPFC) connectivity (12,13). While no studies have specifically examined threat learning in adolescent PTSD, some have examined relationships with PTSD symptoms and found inconsistent relationships for fear acquisition with trauma load and PTSD symptoms, and no relationships with extinction (15,16). Overall, the dearth of information on threat learning in adolescent PTSD remains an important knowledge gap, and one we are actively aiming to address in an ongoing psychophysiology and neuroimaging study. Potential sex differences on threat learning in adolescence are also particularly important given the increased prevalence of PTSD in adolescent females compared to males and the

recent evidence for estradiol modulating extinction learning (17,18). How estrogen and other pubertal hormones impact PTSD risk and threat and extinction learning in adolescence remains an open question.

### *Threat attentional bias*

Threat attentional bias refers to bias in the allocation of attention towards threat-related stimuli and, depending on the stage of processing, can manifest as heightened orientation of attention towards threat, delayed disengagement from threat, or avoidance of threat (19). Attentional threat bias in PTSD was initially conceptualized as automatic orienting towards threat, consistent with hypervigilance symptoms. However, meta-analyses in adult PTSD do not provide support for automatic threat orienting and instead suggest that attentional threat bias operates at a strategic level consistent with delayed disengagement (20). To date, only two studies have examined threat bias in pediatric PTSD. A study of maltreated youth showed that both maltreatment exposure and PTSD were associated with attentional avoidance of angry, but not happy faces, relative to neutral faces (21). On the other hand, a recent study in pre- and early adolescents showed that while trauma exposure was associated with attentional bias towards angry faces, PTSD symptoms were associated with bias towards happy faces (22). Further research is needed to determine the contributions of attentional threat bias to adolescent PTSD. Such studies would ideally include consideration of developmental patterns and sex differences conferring PTSD risk, emergent sex differences in threat bias.

### *Emotion regulation*

Deficits in the regulation of negative emotion have been implicated as a key mechanism linking childhood trauma exposure to a broad array of psychiatric disorders, including PTSD [see also this issue (23)]. Emotion regulation incorporates several processes including emotion awareness and understanding, acceptance/tolerance of emotions, control of impulsive behaviors to reach desired goals, and flexible,

contextually appropriate deployment of regulation strategies during emotional distress (24). Adolescence is a key period of emotion regulation development, and under healthy conditions is characterized by decreased self-reported reactivity to negative stimuli with age (25). Furthermore, healthy adolescents show enhanced cognitive control of negative emotion with age under implicit cognitive-emotional interference tasks (26–29), as well as greater downregulation of negative affect under explicit reappraisal tasks (30–32) (though see (33,34)). In contrast, abuse has been associated with poorer emotion regulation capacity in youth, which mediates risk for adolescent psychopathology including PTSD symptoms (35–39). However, adolescents who are largely resilient show evidence of normative self-reported reactivity and reappraisal of negative emotion (40). Finally, improvements in self-reported emotion regulation during TF-CBT are associated with reduced PTSD symptoms in adolescents (41). These studies suggest that emotion regulation may be an important mechanism linking trauma exposure to resilience or risk for, and recovery from, PTSD in adolescents.

### *Trauma-related cognitions*

Maladaptive belief systems are a central component of psychological theories of PTSD (2,42,43). Much of this work has focused on adults and demonstrates that individuals with PTSD demonstrate negative beliefs about the self (e.g., “I’m damaged”), negative beliefs about the world (e.g., “the world is a dangerous place”), and self-blame (e.g., “the trauma happened because of me”) (44,45). Cognitive theories of PTSD generally posit that these negative beliefs developed following the trauma thereby conferring risk for PTSD (42), though some prospective studies have demonstrated that higher pre-trauma maladaptive beliefs predict greater PTSD symptoms following trauma (46) and thereby also implicate these beliefs as risk factors. Cognitively-oriented treatments for PTSD attempt to identify and challenge these negative beliefs (43). Indeed, dismantling studies have found that sole focus on challenging these beliefs results in greater symptom reduction than narrative exposure therapy (47), and symptom reduction during

prolonged exposure therapy that does not explicitly focus on negative beliefs may nonetheless occur due to changes in negative beliefs (48). While most of this research has been conducted among adults, this work has also been extended to adolescent PTSD (49,50). Meta-analyses also demonstrate heightened negative beliefs about the self, world, and self-blame in adolescent PTSD (45), and degree of these negative beliefs in acutely traumatized children and adolescents prospectively predicts subsequent PTSD symptom (51,52). The gold standard treatment for youth with PTSD, trauma focused cognitive behavioral therapy, involves creation of a trauma narrative and explicit focus on identifying and challenging unhealthy beliefs related to the trauma (49). Further, degree of negative beliefs expressed during TF-CBT, coded through audio recordings of the exposure sessions, predicted degree of symptom improvement up to one year later (53). Continued mechanistic and treatment-oriented research on these higher-order belief systems, couched within normative developmental models of cognitive development, will be important for further improving treatment outcomes.

### **Emerging directions in adolescent PTSD: Additional domains**

#### *Large scale network abnormalities in adolescent PTSD*

Complementing prefrontal-amygdala and -hippocampal findings, recent work increasingly implicates abnormalities in larger brain networks in adolescent PTSD. Core functional brain networks include the default mode network (DMN), involved in self-referential thought and processing, the salience network (SN), involved in detection of relevant internal or external cues including threat, and the central executive network (CEN), involved in goal-directed behavior and emotion regulation (54). To date, few studies have examined large-scale network function in adolescent PTSD. In an initial resting-state study (n=29 PTSD, 30 TD), we found increased within-DMN connectivity (posterior cingulate cortex [PCC] to inferior parietal gyrus), increased within-DMN connectivity with age (PCC to vmPFC), and greater anti-correlation between the PCC and CEN/SN regions in adolescents with PTSD (55). Another resting-state study of adolescent

PTSD showed no differences in PCC connectivity, though may have been limited by small sample size (n=14 PTSD, 24 TD) (56). While further work is needed, these initial findings suggest a pattern of DMN network development which may differ between adolescent and adult PTSD and are consistent with studies above highlighting the role of CEN nodes in emotion regulation.

In addition to resting-state seed-based approaches, studies using graph theoretical approaches suggest alterations in global brain organization among traumatized youth. One such measure is modularity, which refers to greater connectivity among nodes within a network relative to nodes between networks, enabling functional specialization (57–59). In an initial study of 20 adolescent girls with PTSD who performed an emotion processing task before and after TF-CBT, we found that girls with less whole-brain modularity pre-treatment relative to TD girls predicted worse treatment outcomes (60). These findings suggest that intact modular brain organization, and presumably functional specialization, during emotion processing enables better adaptive learning during TF-CBT. These data are also consistent with normative developmental studies demonstrating increasing brain modularity across adolescence, which predicts developmental increases in executive function (57). In a subsequent expanded study of adolescent girls (n=29 TD, n=59 assault victims), we found that maltreatment severity scaled with greater whole-brain modularity during an emotion processing task (61). Controlling for maltreatment severity, girls with PTSD (n=38) had even greater modular brain organization. In the context of normative increases in brain modularity across adolescence, these data could suggest that increased brain modularity in trauma-exposed adolescents, and presumably increased functional specialization, could be adaptive up to a certain point, while overspecialization, as is seen in PTSD and severe early life trauma, becomes maladaptive. In a subset of this sample of individuals completing resting-state fMRI (n=56), we again found that maltreatment was associated with greater whole-brain modularity. Encouragingly, data from a small Chinese sample also found increased global segregation in resting-state connectivity among children with

PTSD following an earthquake (62), albeit using a different network measure of segregation (global clustering coefficient). While further research is warranted to delineate the impact of trauma on large-scale brain organization in youth, these studies, along with recent work in adults (63), suggest that modularity and other brain network properties could be used to identify early patterns of risk and resilience in adolescents, and potentially serve as informative treatment biomarkers.

### *Social cognition and reorienting*

Adolescence is characterized marked changes in social cognition, social brain development, and reorientation towards peer relationships [this issue (64)]. In particular, adolescents show development of more complex social cognitive processes allowing inference of emotional states, motivations, and intentions of others (i.e. mentalizing). These changes are accompanied by structural and functional changes in the “social brain” including the temporoparietal junction, temporal pole, precuneus, and dmPFC. As highlighted in a recent review and meta-analysis, perceived social support is an important buffer against PTSD in the peri-traumatic period, and is a key component in recovery from PTSD (65). This meta-analysis showed that adult PTSD is characterized by deficits in emotion recognition and mentalizing, findings that were not present in traumatized individuals without PTSD.

While gaining increasing study in adolescent populations, little is known about social cognition in adolescent PTSD. A study of inpatient adolescent PTSD found that secure caregiver attachment was positively associated with mentalizing performance, while mentalizing mediated the relationship between attachment and PTSD severity and treatment outcome (66). Studies of emotion recognition in adolescent PTSD are few and show conflicting findings to date. A study of maltreated youth (8-15 years) with and without PTSD found faster recognition of fearful, but not happy or neutral, faces compared to non-maltreated youth, with no effect of PTSD status (67). In contrast, a sample of adolescent boys in

therapeutic day school with and without PTSD found that PTSD symptoms were associated with less accurate recognition of angry relative to fearful, but not sad, faces (68). A recent study by our group found that adolescents with PTSD show reduced accuracy for angry, disgust, and neutral (but not happy or sad) faces compared to TD adolescents and in the absence of visual attention or gender recognition differences (Heyn et al., under review). Surprisingly, PTSD severity was associated with improved accuracy for angry, disgust, and neutral faces, suggesting that impaired emotion recognition may be a predisposing factor for PTSD which, in turn, counteracts recognition deficits. Given the mixed findings to date, however, further study is needed to definitively characterize social cognition performance in adolescent PTSD.

Contrary to what would be expected given hypervigilance, avoidance, and heightened threat interpretations in PTSD, there is a consistent literature, mostly among college aged women, demonstrating significant deficits in risk perceptions of social situations and increased risky social behavior among violence victims. One study among young women examined judgments of written descriptions of social situations with sexual victimization risk and found that greater histories of interpersonal violence were associated with higher thresholds for judging a situation as risky (69). Moreover, another study found that the latency with which victimized young adult women decided to leave hypothetical risky social situations escalating towards rape significantly predicted subsequent revictimization (70). Data also suggests that college age women with histories of interpersonal violence demonstrate less response effectiveness and less response refusal in sexually risky situations (71), less overall sexual assertiveness (72), and greater risky sexual behavior (e.g., number of sexual partners, frequency of unprotected sex, etc.) (73). Building on this literature, we compared social decision-making in victimized adolescent girls using laboratory behavioral tasks. We found that increasing severity of early life abuse, but not clinical symptom severity, was associated with decreased ability to correctly identify trustworthy conspecifics and decreased salience network encoding of unexpectedly bad social outcomes (i.e., negative predictors

errors) in a social version of a probabilistic learning task (74–76). In the neuroeconomic “trust game” task, victimized adolescent girls with no current mental health disorders (i.e., resilient) demonstrated decreased trust behavior compared to victimized girls with anxiety disorders (including PTSD). Victimized girls with anxiety/PTSD also demonstrated globally increased social reciprocity compared to both healthy non-traumatized and resilient girls (77). Overall, these data suggest that early life victimization may create a “vicious cycle”, such that the social deficits consequent to victimization and development of anxiety symptoms may increase likelihood of additional victimization, further increasing risk of mental and physical health problems. Additionally, altered social functioning may prevent development of healthy relationships that provide sources of social support that could promote recovery from PTSD. Further investigation of social functioning, including potential sex differences, in trauma-exposed adolescents will be important for better understanding risk for and maintenance of PTSD.

### *Sleep biology*

Sleep is a fundamental process proposed to maintain overall synaptic homeostasis following the wake period, allowing for proper function in multiple domains including learning and memory, executive function, and emotion regulation (78). Subjective sleep complaints are associated with both trauma exposure and PTSD in adolescents (79). Furthermore, peri-traumatic sleep disturbances appear to increase the risk of PTSD (80), including in adolescents (81). Experimental evidence indicates that impaired sleep is associated with increased reactivity to negative stimuli, reduced emotion regulation, poorer emotion discrimination, and reduced extinction recall (82–84). When exposed to negative stimuli, sleep deprived adults exhibit elevated amygdala reactivity and reduced functional connectivity between the amygdala and the medial prefrontal cortex (85), suggesting acute changes in the neural circuitry underlying emotion regulation and extinction. While such studies implicate sleep disruption as a potential contributor to adolescent PTSD, little is known about the underlying changes in sleep biology in



adolescents following trauma, and how these differ from normative adolescent development. Normative developmental studies have recently highlighted the role of regional slow wave sleep in cortical development. For example, slow wave activity (SWA) is most prominent over posterior regions at early ages, but shifts to prefrontal regions by late adolescence, consistent with synaptic activity and pruning in later maturing cortical regions involved in executive function and emotion regulation (86). At present, no studies have examined regional cortical sleep development in trauma-exposed adolescents or adolescent PTSD. Furthermore, the contribution of cortical sleep abnormalities to neural dysfunction and development, and their related deficits in functional domains, remains an open area of investigation in youth. Preliminary work from our group suggests that cortical SWA may be impaired in adolescents with PTSD, particularly over prefrontal cortical regions (Jones et al., under review). Impairments in prefrontal SWA appear to be further associated with impaired downregulation of affective reactivity to negative stimuli. While early, these and future studies may offer new insights on biological sleep mechanisms in adolescent PTSD and could point to novel interventions targeting sleep consolidation or enhancement to boost emotion regulation and extinction learning.

### *Other domains*

The socioenvironmental factors, biological systems, and functional domains discussed so far are meant to highlight potentially fruitful areas of research to understand the underlying mechanisms of adolescent PTSD but are by no means exhaustive. There are other neurobiological systems and functional domains which have received limited to no study in adolescent PTSD, some of which we will mention here. One example of such a knowledge gap is the genetic and epigenetic underpinnings of adolescent PTSD. While extensive work has been undertaken to explore risk genes and epigenetic modifications contributing to adult PTSD (87), and some work in trauma-exposed youth, to date no studies have examined these processes in adolescent PTSD (88). Such work is inherently limited by the typically modest sample sizes

of this difficult to recruit population and will ultimately require pooling of data as has been done for adult disorders in the Psychiatric Genomics Consortium. Such studies would also benefit from inclusion of caregiver genetic data, given increasing evidence of intergenerational transmission of epigenetic trauma effects (89). Other potentially key knowledge gaps in adolescent PTSD include the role of neuroinflammation, which may link childhood trauma exposure to later psychopathology (90) and the gut microbiome-brain axis, which can influence stress and inflammatory responses with additional potential for intergenerational transmission (91). Additionally, no studies have examined reward processing specifically in adolescent PTSD, an area that would warrant further exploration particularly given the alterations in mood characteristic of PTSD, and its high comorbidity with depressive disorders. Finally, little remains known about sex differences in mechanisms contributing to the heightened risk of PTSD in adolescent females, as well as sex differences in the underlying neurobiology of adolescent PTSD (92–94). Ultimately, increasing knowledge in all domains mentioned above, as well as others, will be crucial in developing a precision medicine approach to mitigate risk and improve treatments for adolescent PTSD.

### Supplemental References

1. Mineka S, Zinbarg R (2006): A contemporary learning theory perspective on the etiology of anxiety disorders: it's not what you thought it was. *American psychologist* 61: 10.
2. Brewin CR, Holmes EA (2003): Psychological theories of posttraumatic stress disorder. *Clinical Psychology Review* 23: 339–376.
3. Pöhlchen D, Leuchs L, Binder FP, Blaskovich B, Nantawisarakul T, Topalidis P, *et al.* (2020): No robust differences in fear conditioning between patients with fear-related disorders and healthy controls. *Behav Res Ther* 129: 103610.
4. Gerlicher AMV, Tüscher O, Kalisch R (2018): Dopamine-dependent prefrontal reactivations explain long-term benefit of fear extinction [no. 1]. *Nature Communications* 9: 1–9.
5. Rothbaum BO, Davis M (2003): Applying learning principles to the treatment of post-trauma reactions. *Ann N Y Acad Sci* 1008: 112–121.
6. Glenn CR, Klein DN, Lissek S, Britton JC, Pine DS, Hajcak G (2012): The development of fear learning and generalization in 8-13 year-olds. *Dev Psychobiol* 54: 675–684.
7. Jovanovic T, Nylocks KM, Gamwell KL, Smith A, Davis TA, Norrholm SD, Bradley B (2014): Development of fear acquisition and extinction in children: Effects of age and anxiety. *Neurobiology of Learning and Memory* 113: 135–142.
8. Johnson DC, Casey BJ (2015): Extinction during memory reconsolidation blocks recovery of fear in adolescents. *Sci Rep* 5: 8863.
9. Marusak HA, Peters CA, Hehr A, Elrahal F, Rabinak CA (2017): A novel paradigm to study interpersonal threat-related learning and extinction in children using virtual reality. *Sci Rep* 7: 16840.
10. Pattwell SS, Duhoux S, Hartley CA, Johnson DC, Jing D, Elliott MD, *et al.* (2012): Altered fear learning across development in both mouse and human. *Proc Natl Acad Sci USA* 109: 16318–16323.
11. Lau JY, Britton JC, Nelson EE, Angold A, Ernst M, Goldwin M, *et al.* (2011): Distinct neural signatures of threat learning in adolescents and adults. *Proc Natl Acad Sci USA* 108: 4500–4505.
12. Britton JC, Grillon C, Lissek S, Norcross MA, Szuhany KL, Chen G, *et al.* (2013): Response to learned threat: An fMRI study in adolescent and adult anxiety. *Am J Psychiatry* 170: 1195–1204.
13. Gold AL, Abend R, Britton JC, Behrens B, Farber M, Ronkin E, *et al.* (2020): Age Differences in the Neural Correlates of Anxiety Disorders: An fMRI Study of Response to Learned Threat. *AJP appi.ajp.2019.19060650*.
14. McGuire JF, Orr SP, Essoe JK-Y, McCracken JT, Storch EA, Piacentini J (2016): Extinction learning in childhood anxiety disorders, obsessive compulsive disorder and post-traumatic stress disorder: implications for treatment. *Expert Rev Neurother* 16: 1155–1174.

15. McLaughlin KA, Sheridan MA, Gold AL, Duys A, Lambert HK, Peverill M, *et al.* (2016): Maltreatment Exposure, Brain Structure, and Fear Conditioning in Children and Adolescents. *Neuropsychopharmacology* 41: 1956–1964.
16. Gamwell K, Nylocks M, Cross D, Bradley B, Norrholm SD, Jovanovic T (2015): Fear conditioned responses and PTSD symptoms in children: Sex differences in fear-related symptoms. *Developmental Psychobiology* 57: 799–808.
17. Garza K, Jovanovic T (2017): Impact of Gender on Child and Adolescent PTSD. *Curr Psychiatry Rep* 19: 87.
18. Hammoud MZ, Foa EB, Milad MR (2020): Oestradiol, threat conditioning and extinction, post-traumatic stress disorder, and prolonged exposure therapy: A common link. *J Neuroendocrinol* 32: e12800.
19. Mogg K, Bradley BP (2018): Anxiety and Threat-Related Attention: Cognitive-Motivational Framework and Treatment. *Trends in Cognitive Sciences* 22: 225–240.
20. Cisler JM, Wolitzky-Taylor KB, Adams TG, Babson KA, Badour CL, Willems JL (2011): The emotional Stroop task and posttraumatic stress disorder: a meta-analysis. *Clin Psychol Rev* 31: 817–828.
21. Pine DS, Mogg K, Bradley BP, Montgomery L, Monk CS, McClure E, *et al.* (2005): Attention bias to threat in maltreated children: implications for vulnerability to stress-related psychopathology. *Am J Psychiatry* 162: 291–296.
22. Lakshman M, Murphy L, Mekawi Y, Carter S, Briscione M, Bradley B, *et al.* (2020): Attention bias towards threat in African American children exposed to early life trauma. *Behavioural Brain Research* 383: 112513.
23. Whittle SL (n.d.): Emotion regulation, psychopathology, and the adolescent brain. *Biological Psychiatry*.
24. Gratz KL, Roemer L (2004): Multidimensional Assessment of Emotion Regulation and Dysregulation: Development, Factor Structure, and Initial Validation of the Difficulties in Emotion Regulation Scale. *Journal of Psychopathology and Behavioral Assessment* 26: 41–54.
25. Silvers JA, Insel C, Powers A, Franz P, Helion C, Martin R, *et al.* (2017): The transition from childhood to adolescence is marked by a general decrease in amygdala reactivity and an affect-specific ventral-to-dorsal shift in medial prefrontal recruitment. *Dev Cogn Neurosci* 25: 128–137.
26. Grose-Fifer J, Rodrigues A, Hoover S, Zottoli T (2013): Attentional capture by emotional faces in adolescence. *Adv Cogn Psychol* 9: 81–91.
27. Hare TA, Tottenham N, Galvan A, Voss HU, Glover GH, Casey BJ (2008): Biological substrates of emotional reactivity and regulation in adolescence during an emotional go-nogo task. *Biol Psychiatry* 63: 927–934.
28. Cohen-Gilbert JE, Thomas KM (2013): Inhibitory control during emotional distraction across adolescence and early adulthood. *Child Dev* 84: 1954–1966.

29. Heller AS, Cohen AO, Dreyfuss MFW, Casey BJ (2016): Changes in cortico-subcortical and subcortico-subcortical connectivity impact cognitive control to emotional cues across development. *Soc Cogn Affect Neurosci* 11: 1910–1918.
30. McRae K, Gross JJ, Weber J, Robertson ER, Sokol-Hessner P, Ray RD, *et al.* (2012): The development of emotion regulation: an fMRI study of cognitive reappraisal in children, adolescents and young adults. *Soc Cogn Affect Neurosci* 7: 11–22.
31. Silvers JA, McRae K, Gabrieli JDE, Gross JJ, Remy KA, Ochsner KN (2012): Age-related differences in emotional reactivity, regulation, and rejection sensitivity in adolescence. *Emotion* 12: 1235–1247.
32. Silvers JA, Shu J, Hubbard AD, Weber J, Ochsner KN (2015): Concurrent and lasting effects of emotion regulation on amygdala response in adolescence and young adulthood. *Dev Sci* 18: 771–784.
33. Pitskel NB, Bolling DZ, Kaiser MD, Crowley MJ, Pelphrey KA (2011): How grossed out are you? The neural bases of emotion regulation from childhood to adolescence. *Dev Cogn Neurosci* 1: 324–337.
34. Stephanou K, Davey CG, Kerestes R, Whittle S, Pujol J, Yücel M, *et al.* (2016): Brain functional correlates of emotion regulation across adolescence and young adulthood. *Hum Brain Mapp* 37: 7–19.
35. John SG, Cisler JM, Sigel BA (2017): Emotion Regulation Mediates the Relationship between a History of Child Abuse and Current PTSD/Depression Severity in Adolescent Females. *J Fam Viol* 1–11.
36. Kim J, Cicchetti D (2010): Longitudinal pathways linking child maltreatment, emotion regulation, peer relations, and psychopathology. *J Child Psychol Psychiatry* 51: 706–716.
37. Kim-Spoon J, Cicchetti D, Rogosch FA (2013): A longitudinal study of emotion regulation, emotion lability-negativity, and internalizing symptomatology in maltreated and nonmaltreated children. *Child Dev* 84: 512–527.
38. VanMeter F, Handley ED, Cicchetti D (2020): The role of coping strategies in the pathway between child maltreatment and internalizing and externalizing behaviors. *Child Abuse & Neglect* 101: 104323.
39. Sundermann JM, DePrince AP (2015): Maltreatment Characteristics and Emotion Regulation (ER) Difficulties as Predictors of Mental Health Symptoms: Results from a Community-Recruited Sample of Female Adolescents. *J Fam Viol* 30: 329–338.
40. McLaughlin KA, Peverill M, Gold AL, Alves S, Sheridan MA (2015): Child Maltreatment and Neural Systems Underlying Emotion Regulation. *J Am Acad Child Adolesc Psychiatry* 54: 753–762.
41. Cisler JM, Sigel BA, Steele JS, Smitherman S, Vanderzee K, Pemberton J, *et al.* (2016): Changes in functional connectivity of the amygdala during cognitive reappraisal predict symptom reduction during trauma-focused cognitive-behavioral therapy among adolescent girls with post-traumatic stress disorder. *Psychol Med* 1–11.
42. Ehlers A, Clark DM (2000): A cognitive model of posttraumatic stress disorder. *Behaviour research and therapy* 38: 319–345.

43. Resick PA, Schnicke MK (1992): Cognitive processing therapy for sexual assault victims. *J Consult Clin Psychol* 60: 748–756.
44. Foa EB, Ehlers A, Clark DM, Tolin DF, Orsillo SM (1999): The posttraumatic cognitions inventory (PTCI): Development and validation. *Psychological assessment* 11: 303.
45. Gomez De La Cuesta G, Schweizer S, Diehle J, Young J, Meiser-Stedman R (2019): The relationship between maladaptive appraisals and posttraumatic stress disorder: a meta-analysis. *European journal of psychotraumatology* 10: 1620084.
46. Bryant RA, Guthrie RM (2007): Maladaptive self-appraisals before trauma exposure predict posttraumatic stress disorder. *Journal of Consulting and Clinical Psychology* 75: 812.
47. Resick PA, Galovski TE, O'Brien Uhlmansiek M, Scher CD, Clum GA, Young-Xu Y (2008): A randomized clinical trial to dismantle components of cognitive processing therapy for posttraumatic stress disorder in female victims of interpersonal violence. *J Consult Clin Psychol* 76: 243–258.
48. Zalta AK, Gillihan SJ, Fisher AJ, Mintz J, McLean CP, Yehuda R, Foa EB (2014): Change in negative cognitions associated with PTSD predicts symptom reduction in prolonged exposure. *Journal of Consulting and Clinical Psychology* 82: 171–175.
49. Cohen JA, Deblinger E, Mannarino AP, Steer RA (2004): A multisite, randomized controlled trial for children with sexual abuse-related PTSD symptoms. *J Am Acad Child Adolesc Psychiatry* 43: 393–402.
50. Meiser-Stedman R, Smith P, Bryant R, Salmon K, Yule W, Dalgleish T, Nixon RDV (2009): Development and validation of the Child Post-Traumatic Cognitions Inventory (CPTCI). *J Child Psychol Psychiatry* 50: 432–440.
51. Meiser-Stedman R, Dalgleish T, Glucksman E, Yule W, Smith P (2009): Maladaptive cognitive appraisals mediate the evolution of posttraumatic stress reactions: A 6-month follow-up of child and adolescent assault and motor vehicle accident survivors. *J Abnorm Psychol* 118: 778–787.
52. Bryant RA, Salmon K, Sinclair E, Davidson P (2007): A prospective study of appraisals in childhood posttraumatic stress disorder. *Behav Res Ther* 45: 2502–2507.
53. Ready CB, Hayes AM, Yasinski CW, Webb C, Gallop R, Deblinger E, Laurenceau J-P (2015): Overgeneralized Beliefs, Accommodation, and Treatment Outcome in Youth Receiving Trauma-Focused Cognitive Behavioral Therapy for Childhood Trauma. *Behavior Therapy* 46: 671–688.
54. Menon V (2011): Large-scale brain networks and psychopathology: a unifying triple network model. *Trends in Cognitive Sciences* 15: 483–506.
55. Patriat R, Birn RM, Keding TJ, Herringa RJ (2016): Default-Mode Network Abnormalities in Pediatric Posttraumatic Stress Disorder. *J Am Acad Child Adolesc Psychiatry* 55: 319–327.
56. Viard A, Mutlu J, Chanraud S, Guenolé F, Egler P-J, Gérardin P, et al. (2019): Altered default mode network connectivity in adolescents with post-traumatic stress disorder. *Neuroimage Clin* 22: 101731.

57. Baum GL, Ciric R, Roalf DR, Betzel RF, Moore TM, Shinohara RT, *et al.* (2017): Modular Segregation of Structural Brain Networks Supports the Development of Executive Function in Youth. *Current Biology* 27: 1561-1572.e8.
58. Chen M, Deem MW (2015): Development of modularity in the neural activity of children's brains. *Phys Biol* 12: 016009.
59. Hartwell LH, Hopfield JJ, Leibler S, Murray AW (1999): From molecular to modular cell biology. *Nature* 402: C47–C52.
60. Cisler JM, Sigel BA, Kramer TL, Smitherman S, Vanderzee K, Pemberton J, Kilts CD (2016): Modes of Large-Scale Brain Network Organization during Threat Processing and Posttraumatic Stress Disorder Symptom Reduction during TF-CBT among Adolescent Girls. *PLoS ONE* 11: e0159620.
61. Cisler JM, Privratsky A, Smitherman S, Herringa RJ, Kilts CD (2018): Large-scale brain organization during facial emotion processing as a function of early life trauma among adolescent girls. *NeuroImage: Clinical* 17: 778–785.
62. Suo X, Lei D, Li K, Chen F, Li F, Li L, *et al.* (2015): Disrupted brain network topology in pediatric posttraumatic stress disorder: A resting-state fMRI study: Suo et al. *Human Brain Mapping* 36: 3677–3686.
63. Ohashi K, Anderson CM, Bolger EA, Khan A, McGreenery CE, Teicher MH (2019): Susceptibility or Resilience to Maltreatment Can Be Explained by Specific Differences in Brain Network Architecture. *Biol Psychiatry* 85: 690–702.
64. Pfeifer JH (n.d.): Social development, brain development, and psychopathology in adolescence. *Biological Psychiatry*.
65. Stevens JS, Jovanovic T (2019): Role of social cognition in post-traumatic stress disorder: A review and meta-analysis. *Genes Brain Behav* 18: e12518.
66. Venta A, Hatkevich C, Mellick W, Vanwoerden S, Sharp C (2017): Social cognition mediates the relation between attachment schemas and posttraumatic stress disorder. *Psychol Trauma* 9: 88–95.
67. Masten CL, Guyer AE, Hodgdon HB, McClure EB, Charney DS, Ernst M, *et al.* (2008): Recognition of facial emotions among maltreated children with high rates of post-traumatic stress disorder. *Child Abuse Negl* 32: 139–153.
68. Javdani S, Sadeh N, Donenberg GR, Emerson EM, Houck C, Brown LK (2017): Affect recognition among adolescents in therapeutic schools: relationships with posttraumatic stress disorder and conduct disorder symptoms. *Child Adolesc Ment Health* 22: 42–48.
69. Yeater EA, Treat TA, Viken RJ, McFall RM (2010): Cognitive processes underlying women's risk judgments: associations with sexual victimization history and rape myth acceptance. *J Consult Clin Psychol* 78: 375–386.
70. Messman-Moore TL, Brown AL (2006): Risk perception, rape, and sexual revictimization: A prospective study of college women. *Psychology of Women Quarterly* 30: 159–172.

71. Yeater EA, McFall RM, Viken RJ (2011): The Relationship Between Women's Response Effectiveness and a History of Sexual Victimization. *Journal of Interpersonal Violence* 26: 462–478.
72. Livingston JA, Testa M, VanZile-Tamsen C (2007): The Reciprocal Relationship Between Sexual Victimization and Sexual Assertiveness. *Violence Against Women* 13: 298–313.
73. Messman-Moore TL, Walsh KL, DiLillo D (2010): Emotion dysregulation and risky sexual behavior in revictimization. *Child Abuse Negl* 34: 967–976.
74. Lenow J, Cisler J, Bush K (2018): Altered Trust Learning Mechanisms Among Female Adolescent Victims of Interpersonal Violence. *J Interpers Violence* 33: 159–179.
75. Lenow JK, Scott Steele J, Smitherman S, Kilts CD, Cisler JM (2014): Attenuated behavioral and brain responses to trust violations among assaulted adolescent girls. *Psychiatry Res* 223: 1–8.
76. Cisler JM, Esbensen K, Sellnow K, Ross M, Weaver S, Sartin-Tarm A, *et al.* (2019): Differential Roles of the Salience Network During Prediction Error Encoding and Facial Emotion Processing Among Female Adolescent Assault Victims. *BPS: CNVI* 4: 371–380.
77. Sellnow K, Esbensen K, Cisler JM (2019): Social Trust and Reciprocity Among Adolescent Girls Exposed to Interpersonal Violence. *J Interpers Violence* 0886260519881522.
78. Tononi G, Cirelli C (2020): Sleep and synaptic down-selection. *Eur J Neurosci* 51: 413–421.
79. Kovachy B, O'Hara R, Hawkins N, Gershon A, Primeau MM, Madej J, Carrion V (2013): Sleep Disturbance in Pediatric PTSD: Current Findings and Future Directions. *J Clin Sleep Med* 9: 501–510.
80. Germain A, McKeon AB, Campbell RL (2017): Sleep in PTSD: Conceptual model and novel directions in brain-based research and interventions. *Curr Opin Psychol* 14: 84–89.
81. Zhou X, Wu X, An Y, Fu F (2014): Longitudinal relationships between posttraumatic stress symptoms and sleep problems in adolescent survivors following the Wenchuan earthquake in China. *PLoS ONE* 9: e104470.
82. Beebe DW (2011): Cognitive, behavioral, and functional consequences of inadequate sleep in children and adolescents. *Pediatr Clin North Am* 58: 649–665.
83. Watling J, Pawlik B, Scott K, Booth S, Short MA (2017): Sleep Loss and Affective Functioning: More Than Just Mood. *Behav Sleep Med* 15: 394–409.
84. Straus LD, Drummond SPA, Risbrough VB, Norman SB (2018): Sleep Disruption, Safety Learning, and Fear Extinction in Humans: Implications for Posttraumatic Stress Disorder. *Curr Top Behav Neurosci* 38: 193–205.
85. Yoo S-S, Gujar N, Hu P, Jolesz FA, Walker MP (2007): The human emotional brain without sleep--a prefrontal amygdala disconnect. *Curr Biol* 17: R877-878.
86. Kurth S, Ringli M, Geiger A, LeBourgeois M, Jenni OG, Huber R (2010): Mapping of cortical activity in the first two decades of life: a high-density sleep electroencephalogram study. *J Neurosci* 30: 13211–13219.



87. Daskalakis NP, Rijal CM, King C, Huckins LM, Ressler KJ (2018): Recent Genetics and Epigenetics Approaches to PTSD. *Curr Psychiatry Rep* 20: 30.
88. Herringa RJ (2017): Trauma, PTSD, and the Developing Brain. *Curr Psychiatry Rep* 19: 69.
89. Bhattacharya S, Fontaine A, MacCallum PE, Drover J, Blundell J (2019): Stress Across Generations: DNA Methylation as a Potential Mechanism Underlying Intergenerational Effects of Stress in Both Post-traumatic Stress Disorder and Pre-clinical Predator Stress Rodent Models. *Front Behav Neurosci* 13: 113.
90. Nusslock R, Miller GE (2016): Early-Life Adversity and Physical and Emotional Health Across the Lifespan: A Neuroimmune Network Hypothesis. *Biol Psychiatry* 80: 23–32.
91. Simkin DR (2019): Microbiome and Mental Health, Specifically as It Relates to Adolescents. *Curr Psychiatry Rep* 21: 93.
92. Stevens JS, van Rooij SJH, Jovanovic T (2018): Developmental Contributors to Trauma Response: The Importance of Sensitive Periods, Early Environment, and Sex Differences. *Curr Top Behav Neurosci* 38: 1–22.
93. De Bellis MD, Keshavan MS (2003): Sex differences in brain maturation in maltreatment-related pediatric posttraumatic stress disorder. *Neurosci Biobehav Rev* 27: 103–117.
94. Crozier JC, Wang L, Huettel SA, De Bellis MD (2014): Neural correlates of cognitive and affective processing in maltreated youth with posttraumatic stress symptoms: does gender matter? *Dev Psychopathol* 26: 491–513.
